# Supplementary material for: Species of Dickeya and Pectobacterium Isolated during an Outbreak of Blackleg and Soft Rot of Potato in Northeastern and North Central United States
Source: MDPI journal article supplement (doi:10.3390/microorganisms9081733), 2021-08-14
Supplement: s1 [file s1]

**Table S1.** Haplotypes of *dnaJ*, *dnaX*, and *gyrB* and sequence types (ST) of strains within the MLSA clade of *Dickeya dianthicola*.

| Strain <sup>a</sup>   | Geographic origin | haplotypes <sup>b</sup> |             |             | ST <sup>c</sup> |
|-----------------------|-------------------|-------------------------|-------------|-------------|-----------------|
|                       |                   | <i>dnaJ</i>             | <i>dnaX</i> | <i>gyrB</i> |                 |
| FL13                  | Florida           | 1                       | 1           | 1           | 1               |
| 16MB-01               | Maine             | 1                       | 1           | 1           | 1               |
| ME23                  | Maine             | 1                       | 1           | 1           | 1               |
| ME30                  | Maine             | 1                       | 1           | 1           | 1               |
| ST64                  | Maine             | 1                       | 1           | 1           | 1               |
| 16MA-15T              | Massachusetts     | 1                       | 1           | 1           | 1               |
| 2820                  | Michigan          | 1                       | 1           | 1           | 1               |
| NY1528B               | New York          | 1                       | 1           | 1           | 1               |
| NY1536B               | New York          | 1                       | 1           | 1           | 1               |
| NY1547B               | New York          | 1                       | 1           | 1           | 1               |
| NY1557A               | New York          | 1                       | 1           | 1           | 1               |
| NY1558D               | New York          | 1                       | 1           | 1           | 1               |
| NY1559C               | New York          | 1                       | 1           | 1           | 1               |
| NY1562C               | New York          | 1                       | 1           | 1           | 1               |
| NY1578A               | New York          | 1                       | 1           | 1           | 1               |
| BP7034                | Pennsylvania      | 1                       | 1           | 1           | 1               |
| PA24                  | Pennsylvania      | 1                       | 1           | 1           | 1               |
| NY1556C               | New York          | 2                       | 1           | 1           | 2               |
| NCPPB 3534            | Netherlands       | 3                       | 1           | 2           | 3               |
| IPO 980               | Netherlands       | 4                       | 1           | 3           | 4               |
| RNS04.9               | France            | 1                       | 2           | 3           | 5               |
| 600                   | Georgia           | 1                       | 2           | 3           | 5               |
| 16NJ-12 1             | New Jersey        | 1                       | 2           | 3           | 5               |
| LMG 2485 <sup>T</sup> | United Kingdom    | 1                       | 2           | 3           | 5               |
| GBBC 2039             | Belgium           | 4                       | 2           | 3           | 6               |

<sup>a</sup> All strains from Florida, Maine, Massachusetts, Michigan, New Jersey, New York, and Pennsylvania originated from potato or water samples collected in 2015 and 2016. Strain 600 is a historical strain isolated previously from sweet potato in Georgia (date unknown) and held in the R. S. Dickey collection. LMG 2485<sup>T</sup> was obtained from the Belgian Co-Ordinated Collections of Micro-Organisms (BCCM/LMG).

<sup>b</sup> Sequence data for reference strains NCPPB 3534, IPO 980, GBBC 2039, and RNS04.9 were obtained from GenBank and ASAP, as described in Table 3. All other DNA sequences were amplified in this study. Sequences of *dnaJ* (672 bp), *dnaX* (450 bp), and *gyrB* (822 bp) having at least a single nucleotide difference were assigned different haplotypes for that locus.

<sup>c</sup> Each unique concatenated sequence, based on allelic variation of *dnaJ*, *dnaX*, and *gyrB*, was assigned a unique sequence type (ST).

**Table S2.** Allelic variation in *dnaJ*, *dnaX*, and *gyrB* and sequence types (ST) of strains within the MLSA clade of *Pectobacterium parmentieri*.

| Strain <sup>a</sup>       | Geographic origin | haplotypes <sup>b</sup> |             |             | ST <sup>c</sup> |
|---------------------------|-------------------|-------------------------|-------------|-------------|-----------------|
|                           |                   | <i>dnaJ</i>             | <i>dnaX</i> | <i>gyrB</i> |                 |
| 3230                      | Michigan          | 4                       | 1           | 4           | 1               |
| RNS 08-42-1A <sup>T</sup> | France            | 7                       | 1           | 1           | 2               |
| CIR1146                   | Minnesota         | 7                       | 1           | 1           | 2               |
| CIR1018                   | Minnesota         | 7                       | 1           | 1           | 2               |
| CIR1056                   | Minnesota         | 7                       | 1           | 1           | 2               |
| CIR1058                   | Minnesota         | 7                       | 1           | 1           | 2               |
| CIR1059                   | Minnesota         | 7                       | 1           | 1           | 2               |
| CIR1009                   | Minnesota         | 7                       | 1           | 1           | 2               |
| NY1532B                   | New York          | 7                       | 1           | 1           | 2               |
| CIR1102                   | North Dakota      | 7                       | 1           | 1           | 2               |

|         |              |   |   |   |    |
|---------|--------------|---|---|---|----|
| CIR1114 | North Dakota | 7 | 1 | 1 | 2  |
| CIR1127 | North Dakota | 7 | 1 | 1 | 2  |
| CIR1137 | North Dakota | 7 | 1 | 1 | 2  |
| CIR1160 | North Dakota | 7 | 1 | 1 | 2  |
| CIR1095 | North Dakota | 7 | 1 | 1 | 2  |
| NY1533B | New York     | 6 | 3 | 5 | 3  |
| NY1539A | New York     | 1 | 3 | 4 | 4  |
| Scc3193 | Finland      | 1 | 2 | 6 | 5  |
| CIR1175 | Minnesota    | 1 | 2 | 6 | 5  |
| CIR1176 | Minnesota    | 1 | 2 | 6 | 5  |
| CIR1177 | Minnesota    | 1 | 2 | 6 | 5  |
| CIR1178 | Minnesota    | 1 | 2 | 6 | 5  |
| CIR1179 | Minnesota    | 1 | 2 | 6 | 5  |
| CIR1180 | Minnesota    | 1 | 2 | 6 | 5  |
| CIR1181 | Minnesota    | 1 | 2 | 6 | 5  |
| NY1548A | New York     | 1 | 2 | 6 | 5  |
| NY1585A | New York     | 1 | 2 | 6 | 5  |
| NY1587A | New York     | 1 | 2 | 6 | 5  |
| CIR1054 | North Dakota | 1 | 2 | 6 | 5  |
| CIR1055 | North Dakota | 1 | 2 | 6 | 5  |
| NY1584A | New York     | 1 | 3 | 5 | 6  |
| NY1588A | New York     | 2 | 2 | 6 | 7  |
| CIR1153 | Minnesota    | 3 | 1 | 2 | 8  |
| CIR1154 | Minnesota    | 3 | 1 | 2 | 8  |
| CIR1002 | Minnesota    | 3 | 1 | 2 | 8  |
| CIR1108 | North Dakota | 3 | 1 | 2 | 8  |
| CIR1019 | Minnesota    | 7 | 4 | 1 | 9  |
| CIR1021 | Minnesota    | 5 | 2 | 3 | 10 |
| CIR1051 | North Dakota | 5 | 2 | 3 | 10 |

<sup>a</sup> All strains from Michigan, Minnesota, New York, and North Dakota originated from potato samples collected in 2015 and 2016.

<sup>b</sup> Sequence data for the type strain RNS 08-42-1AT and for reference strain Scc3193 were obtained from GenBank and ASAP, as described in Tables 2 and 3. All other DNA sequences were amplified in this study. Sequences of dnaJ (672 bp), dnaX (450 bp), and gyrB (711 bp) having at least one nucleotide difference were assigned different haplotype numbers.

<sup>c</sup> Each unique concatenated sequence, based on haplotypes of dnaJ, dnaX, and gyrB, was assigned a unique sequence type (ST).
